# Supplementary material
Source: publisher site journal article supplement (https://www.dovepress.com/article/376664)
Supplement: Supplementary file 1 [file get_supplementary_file.php]

**Supplementary File**

**Appendix: Data collection tool**

**Section 1 Demographic details**

- **Age (in years):** _____________________
- **Name of Hospital:** _____________________
- **Gender:**  A) Female B) Male
- **Designation:** A) Head nurse B) Staff Nurse
- **Degree:** A) Bachelor B) Master or above
- **Marital Status:** A) Non-Married B) Married
- **Residence:** A) Rural B) Urban
- **Working Department:** A) Emergency B) Pead’s C) Gynae

D) Corona E) Cardiac F) Medicine

G) Surgery H) Dialysis I) ICU/CCU

K) Operation Theater

- **Years of Experiences:** A) 1-2 years B) 3-5 years C) 6-10 years

D) 11-15 years E) More than 16 years

| Section 2.  Perception towards Antimicrobial Stewardship Programs (ASPs).  Every question has five options, given above.  Please select one option in front of each question | | strongly agree | agree | Neutral | disagree | Strongly disagree |
| --- | --- | --- | --- | --- | --- | --- |
|  | Antimicrobial stewardship programs promote reasonable prescription of antimicrobials | ⭘ | ⭘ | ⭘ | ⭘ | ⭘ |
|  | Antimicrobial stewardship programs help control antimicrobial resistance | ⭘ | ⭘ | ⭘ | ⭘ | ⭘ |
|  | Antimicrobial stewardship programs reduce the overuse of antimicrobials | ⭘ | ⭘ | ⭘ | ⭘ | ⭘ |
|  | Antimicrobial stewardship programs reduce the cost of treatment. | ⭘ | ⭘ | ⭘ | ⭘ | ⭘ |
|  | Antimicrobial stewardship programs Improves medical quality. | ⭘ | ⭘ | ⭘ | ⭘ | ⭘ |

| Section 3: Involvement in antimicrobial stewardship programs (ASPs).  Every question has five options (Always, often, sometimes, seldom and never). Please select only one from five options in each question. | | Always | Often | Sometimes | Seldom | Never |
| --- | --- | --- | --- | --- | --- | --- |
| 1 | I review prescription of antimicrobials. | ⭘ | ⭘ | ⭘ | ⭘ | ⭘ |
| 2 | I proactively intervene in problematic prescriptions of antimicrobials | ⭘ | ⭘ | ⭘ | ⭘ | ⭘ |
| 3 | I comment on antimicrobial prescriptions and medical orders. | ⭘ | ⭘ | ⭘ | ⭘ | ⭘ |
| 4 | I provide feedback on antimicrobial prescriptions and medical orders | ⭘ | ⭘ | ⭘ | ⭘ | ⭘ |

| 5 | I participate in decision-making of antimicrobial treatment for critically ill patients. | ⭘ | ⭘ | ⭘ | ⭘ | ⭘ |
| --- | --- | --- | --- | --- | --- | --- |
| 6 | I participate in antimicrobial stewardship committee meetings and decision making | ⭘ | ⭘ | ⭘ | ⭘ | ⭘ |
| 7 | I provide advice to doctors regarding the intravenous-to-oral conversion of antimicrobials | ⭘ | ⭘ | ⭘ | ⭘ | ⭘ |
| 8 | I provide advice to doctors about the adverse drug effects of antimicrobials | ⭘ | ⭘ | ⭘ | ⭘ | ⭘ |
| 9 | I provide advice to doctors about drug interactions related to antimicrobials | ⭘ | ⭘ | ⭘ | ⭘ | ⭘ |
| 10 | I monitor the duration of antimicrobial treatment and recommend appropriate cessation. | ⭘ | ⭘ | ⭘ | ⭘ | ⭘ |
| 11 | I participate in developing hospital antimicrobial treatment guidelines. | ⭘ | ⭘ | ⭘ | ⭘ | ⭘ |
| 12 | I provide feedback to doctors on bacterial resistance. | ⭘ | ⭘ | ⭘ | ⭘ | ⭘ |
| 13 | I participate in the management and evaluation of antimicrobial types in hospital. | ⭘ | ⭘ | ⭘ | ⭘ | ⭘ |
| 14 | I monitor and evaluate antimicrobial consumption in hospital. | ⭘ | ⭘ | ⭘ | ⭘ | ⭘ |
| 15 | I communicate with doctors on anti-infective treatment. | ⭘ | ⭘ | ⭘ | ⭘ | ⭘ |
| 16 | I communicate with patients and family members on antimicrobial treatment | ⭘ | ⭘ | ⭘ | ⭘ | ⭘ |

| Section 4: Confidence to perform ASP activities  Every question has five options (Very confident, confident, neutral, unconfident and very unconfident). Please select only one from five options in each question. | | Very confident | confident | Neutral | unconfident | Very unconfident |
| --- | --- | --- | --- | --- | --- | --- |
|  | To review the appropriateness of antimicrobials use | ⭘ | ⭘ | ⭘ | ⭘ | ⭘ |
|  | To determine the antimicrobial type to treat common infections (such as pneumonia, urinary tract infections | ⭘ | ⭘ | ⭘ | ⭘ | ⭘ |
|  | To adjust the dose and frequency of antimicrobials based on patient and infections | ⭘ | ⭘ | ⭘ | ⭘ | ⭘ |
|  | To optimize antimicrobial treatment based on pharmacodynamic and pharmacokinetic parameters | ⭘ | ⭘ | ⭘ | ⭘ | ⭘ |
|  | To provide reasonable advice on the course of antimicrobial treatment | ⭘ | ⭘ | ⭘ | ⭘ | ⭘ |
|  | To identify unnecessary antimicrobial treatment and suggest stopping treatment | ⭘ | ⭘ | ⭘ | ⭘ | ⭘ |
|  | To participate in consultation and case discussion on antimicrobial treatment | ⭘ | ⭘ | ⭘ | ⭘ | ⭘ |

| Section Section 5: Barriers towards ASP activities  Every question has five options (Strongly agree, agree, neutral, disagree and strongly disagree). Please select only one from five options in each question.  What is your opinion about the following barriers towards ASP activities? | | strongly agree | agree | Neutral | disagree | Strongly disagree |
| --- | --- | --- | --- | --- | --- | --- |
| 1 | Have limited knowledge of antimicrobial treatment (indications, dosage, duration, combination and adverse reactions | ⭘ | ⭘ | ⭘ | ⭘ | ⭘ |
| 2 | Attention from the hospital administration about ASPs is not enough | ⭘ | ⭘ | ⭘ | ⭘ | ⭘ |
| 3 | Participation in ASPs will make no difference | ⭘ | ⭘ | ⭘ | ⭘ | ⭘ |
| 4 | Have limited time to participate in ASPs due to other daily work | ⭘ | ⭘ | ⭘ | ⭘ | ⭘ |
| 5 | There is a lack of efficient communication between nurses and doctors | ⭘ | ⭘ | ⭘ | ⭘ | ⭘ |
| 6 | Nurses’ advice on antimicrobials has not been widely accepted by doctors | ⭘ | ⭘ | ⭘ | ⭘ | ⭘ |
| 7 | Lack of adequate number of trained nurses | ⭘ | ⭘ | ⭘ | ⭘ | ⭘ |
| 8 | Lack of training about antimicrobial stewardship programs | ⭘ | ⭘ | ⭘ | ⭘ | ⭘ |

***Thank you taking part in our study.***

**Supplementary Table 1: Reliability of the questionnaire**

| Domains | Cronbach's Alpha |
| --- | --- |
| Perception towards ASPs | 0.714 |
| Involvement in ASPs | 0.907 |
| Confidence to perform ASP activities | 0.927 |
| Barriers towards ASP activities | 0.684 |

The sum score of each domain was calculated. The item-specific rating converted into a score ranges from zero to four by considering the least score to the most unfavorable rating (strongly disagree/never/very unconfident) and the highest rating to most favorable rating (strongly agree/always/very confident)
